# Supplementary material for: Direct C–C coupling of bio-ethanol into 2,3-butanediol by photochemical and photocatalytic oxidation with hydrogen peroxide
Source: Royal Society of Chemistry journal article supplement (doi:10.1039/c6gc00883f), 2016-01-01
Supplement: c6gc00883f1.pdf [file c6gc00883f1.pdf]

# Direct C–C coupling of bio-ethanol into 2,3-butanediol by photochemical and photocatalytic oxidation with Hydrogen peroxide

Na Li,<sup>a</sup> wenjun Yan,<sup>a</sup> Pengju Yang,<sup>a,b</sup> Hongxia Zhang,<sup>a,c</sup> Zhijian Wang,<sup>a</sup> jianfeng zheng<sup>a</sup> Suping Jia<sup>a</sup> and  
Zhenping Zhu<sup>\*a</sup>

<sup>a</sup>State Key Laboratory of Coal Conversion, Institute of Coal Chemistry, Chinese Academy of Sciences,  
Taiyuan 030001 Shanxi, China, E-mail: zpzhu@sxicc.ac.cn

<sup>b</sup>Graduate University of Chinese Academy of Sciences, Beijing 100039, China

<sup>c</sup>Institute of Application Chemistry, shanxi University, Taiyuan 030001, china.

## Supplementary Information

This Supplementary Information contains Figures S1-S3 and Table S1-S2.

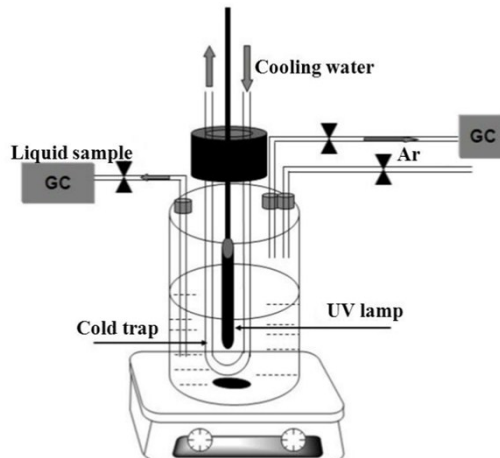

Figures S1: A schematic of the employed photochemical and photocatalytic reactor

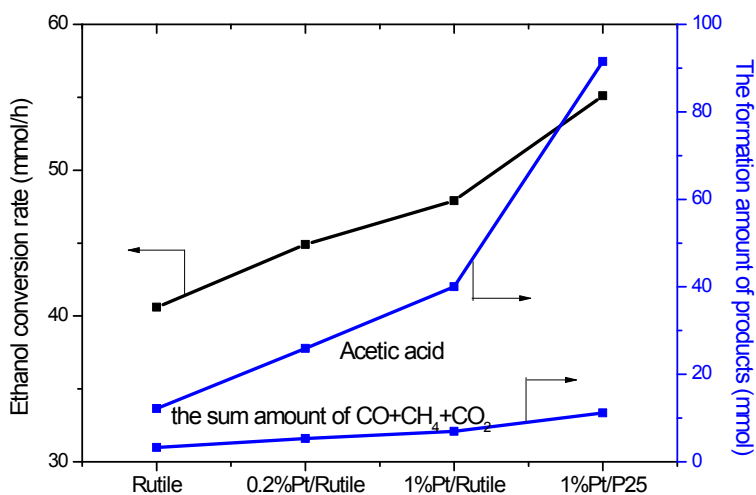

Figure S2 the formation amount of by-product and ethanol conversion rate as a function of different photocatalysts. Reaction reaction: 298K, ethanol 0.959mol, aqueous solution H<sub>2</sub>O<sub>2</sub> (30%) (0.1mol) was added by successive addition at 2ml/h for 5h, 0.2g of catalyst, with 0.2% or 1% of Pt co-catalyst 200 ml; 300 W high pressure Hg lamp.

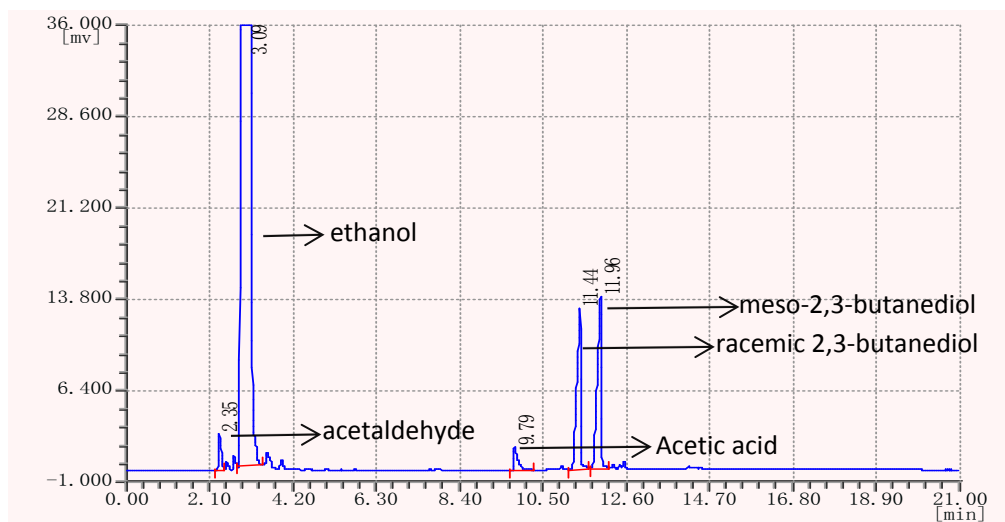

Figure S3: Gas chromatogram of the liquid products obtained under UV irradiation (Reaction conduction: 298K, ethanol 0.959mol, aqueous solution H<sub>2</sub>O<sub>2</sub> (30%) 0.1mol, 200 ml); We employed a gas chromatograph to analyze the Liquid samples which was confirmed by comparing the mass spectrum and retention of standard pure sample. The products name was mark in the chromatogram. The 2,3-BDO included racemic-2,3-BDO and meso-2,3-BDO.

Table S1. Experimental data for the photocatalytic C-C coupling of ethanol<sup>a</sup>

$$\text{CH}_3\text{CH}_2\text{OH} + \text{H}_2\text{O}_2 \xrightarrow{h\nu} \text{CH}_3\text{CH}(\text{OH})\text{CH}(\text{OH})\text{CH}_3 + \text{H}_2\text{O}$$

| Entry | catalyst                         | Con. (%) | Selectivity (%) |          |             | Gas formation rate <sup>b</sup> of (CO+CH <sub>4</sub> +CO <sub>2</sub> ) (μmol h <sup>-1</sup> ) | Formation rate of 2,3-BDO <sup>c</sup> (mmol h <sup>-1</sup> ) |
|-------|----------------------------------|----------|-----------------|----------|-------------|---------------------------------------------------------------------------------------------------|----------------------------------------------------------------|
|       |                                  |          | 2,3-BDO         | Aldehyde | Acetic acid |                                                                                                   |                                                                |
| 1     | no                               | 19.4     | 91.3            | 2.14     | 1.90        | 546                                                                                               | 15.3                                                           |
| 2     | Rutile                           | 22.4     | 86.1            | 1.06     | 6.03        | 654                                                                                               | 17.5                                                           |
| 3     | 0.2%Pt/Rutile                    | 24.9     | 81.4            | 1.65     | 11.3        | 1064                                                                                              | 18.3                                                           |
| 4     | 1%Pt/Rutile                      | 26.8     | 61.9            | 1.83     | 16.7        | 1394                                                                                              | 14.9                                                           |
| 5     | 1%Pt/P25                         | 31.4     | 36.5            | 1.54     | 33.2        | 2240                                                                                              | 10.1                                                           |
| 6     | SiO <sub>2</sub>                 | 25.0     | 75.5            | 1.73     | 4.18        | 818                                                                                               | 16.0                                                           |
| 7     | SBA-15                           | 27.9     | 72.5            | 1.79     | 5.68        | 1046                                                                                              | 18.0                                                           |
| 8     | γ-Al <sub>2</sub> O <sub>3</sub> | 32.1     | 68.6            | 1.35     | 5.96        | 1194                                                                                              | 18.9                                                           |

<sup>a</sup> Reaction condition: 298K, ethanol 0.959mol, aqueous solution H<sub>2</sub>O<sub>2</sub> (30%) 0.1mol was added by successive addition at 2ml/h, 0.2g of catalyst with 0.2% or 1% of Pt co-catalyst, 200 ml; 300 W high pressure Hg lamp (λ=365 nm), 5h of irradiation time. <sup>b</sup> The rate was calculated on the basis sum of the CO, CH<sub>4</sub> and CO<sub>2</sub> formation rate; <sup>c</sup> The rate was calculated on the basis of the generated 2,3-BDO.

Table S2. The repeatability of photochemical reaction

| Entry | Conversion (%) | Selectivity (%) |          |             |
|-------|----------------|-----------------|----------|-------------|
|       |                | 2,3-BDO         | Aldehyde | Acetic acid |
| 1     | 19.4           | 91.3            | 2.14     | 1.90        |
| 2     | 18.5           | 92.3            | 1.21     | 1.30        |
| 3     | 20.1           | 90.5            | 3.21     | 2.10        |

Reaction conduction: 298K, ethanol 0.959mol, aqueous H<sub>2</sub>O<sub>2</sub> (30%) 0.1mol was added by successive addition at 2ml/h for 5h, 200 ml; 300 W high pressure Hg lamp (λ=365 nm); The conversion of ethanol and the 2,3-BDO selectivity had negligible changes for three repeated experiments, confirming good repeatability for this method.
